# Supplementary material for: Secondhand smoke exposure and mental health problems in Korean adults
Source: PubMed Central journal article supplement (PMC4846743; doi:10.4178/epih.e2016009), 2016-03-14
Supplement: epih-38-e2016009-app1.pdf [file epih-38-e2016009-app1.pdf]

**Appendix 1.** Factors associated with secondhand smoke exposure (SHSE)

| Variables (n = 123,665)                       | SHSE          |               | p-value | Odds ratio (95% confidence interval) |                       |
|-----------------------------------------------|---------------|---------------|---------|--------------------------------------|-----------------------|
|                                               | No            | Yes           |         | Unadjusted                           | Gender, age -adjusted |
| Age (yr)                                      |               |               | <0.001  |                                      |                       |
| 19-39                                         | 16,702 (30.4) | 22,343 (32.5) |         | 1.00                                 | 1.00                  |
| 40-59                                         | 24,001 (43.7) | 25,586 (37.2) |         | 0.85 (0.83, 0.89)                    | 0.82 (0.79, 0.84)     |
| ≥60                                           | 14,198 (25.9) | 20,865 (30.3) |         | 1.67 (1.60, 1.73)                    | 1.59 (1.53, 1.65)     |
| Gender                                        |               |               | <0.001  |                                      |                       |
| Men                                           | 12,484 (22.7) | 10,334 (15.0) |         | 1.00                                 | 1.00                  |
| Women                                         | 42,417 (77.3) | 58,430 (85.0) |         | 1.46 (1.41, 1.52)                    | 1.43 (1.37, 1.48)     |
| Marriage                                      |               |               | <0.001  |                                      |                       |
| Never married                                 | 8,565 (15.6)  | 10,846 (15.8) |         | 1.00                                 | 1.00                  |
| Married                                       | 37,593 (68.5) | 45,692 (66.5) |         | 1.00 (0.96, 1.03)                    | 0.75 (0.71, 0.79)     |
| Divorced/separated/widowed                    | 8,701 (15.9)  | 12,181 (17.7) |         | 1.20 (1.14, 1.26)                    | 0.76 (0.71, 0.81)     |
| Income per month (10 <sup>4</sup> Korean won) |               |               | <0.001  |                                      |                       |
| ≥4.0                                          | 12,413 (22.6) | 12,929 (18.8) |         | 1.00                                 | 1.00                  |
| <1.0                                          | 16,088 (29.3) | 20,689 (30.1) |         | 1.53 (1.47, 1.60)                    | 1.46 (1.40, 1.53)     |
| 1.0-<2.5                                      | 14,487 (26.4) | 19,284 (28.0) |         | 1.42 (1.36, 1.49)                    | 1.40 (1.34, 1.46)     |
| 2.5-<4.0                                      | 11,913 (21.7) | 15,862 (23.1) |         | 1.28 (1.23, 1.34)                    | 1.28 (1.22, 1.34)     |
| Education                                     |               |               | <0.001  |                                      |                       |
| Middle school or lower                        | 20,501 (37.3) | 27,228 (39.6) |         | 1.00                                 | 1.00                  |
| High school                                   | 21,968 (40.0) | 31,764 (46.2) |         | 0.83 (0.80, 0.86)                    | 0.81 (0.78, 0.85)     |
| College or higher                             | 12,432 (22.6) | 9,772 (14.2)  |         | 0.41 (0.40, 0.43)                    | 0.41 (0.39, 0.43)     |
| Occupation                                    |               |               | <0.001  |                                      |                       |
| Unemployed or housekeeper                     | 8,023 (14.6)  | 46,137 (67.2) |         | 1.00                                 | 1.00                  |
| Experts                                       | 10,129 (18.5) | 3,119 (4.5)   |         | 0.05 (0.04, 0.05)                    | 0.04 (0.04, 0.05)     |
| Clerical/services                             | 16,823 (30.7) | 10,238 (14.9) |         | 0.08 (0.08, 0.09)                    | 0.08 (0.08, 0.08)     |
| Simple skill                                  | 19,855 (36.2) | 9,205 (13.4)  |         | 0.09 (0.09, 0.10)                    | 0.09 (0.09, 0.10)     |
| Drinking                                      |               |               | <0.001  |                                      |                       |
| Regular alcohol drinkers                      | 2,710 (4.9)   | 2,954 (4.3)   |         | 0.83 (0.78, 0.89)                    | 0.95 (0.88, 1.01)     |

Values are presented as number (%).
