# Supplementary material for: Secondhand smoke exposure and mental health problems in Korean adults
Source: PubMed Central journal article supplement (PMC4846743; doi:10.4178/epih.e2016009), 2016-03-14
Supplement: epih-38-e2016009-app2.pdf [file epih-38-e2016009-app2.pdf]

**Appendix 2.** Factors associated with diagnosed depression

| Variables (n = 123,665)                       | Diagnosed depression |              | p-value | Odds ratio (95% confidence interval) |                       |
|-----------------------------------------------|----------------------|--------------|---------|--------------------------------------|-----------------------|
|                                               | No                   | Yes          |         | Unadjusted                           | Gender, age -adjusted |
| Age (yr)                                      |                      |              | <0.001  |                                      |                       |
| 19-39                                         | 38,548 (32.0)        | 486 (15.9)   |         | 1.00                                 | 1.00                  |
| 40-59                                         | 48,265 (40.0)        | 1,314 (42.8) |         | 1.99 (1.76, 2.26)                    | 1.82 (1.61, 2.07)     |
| ≥60                                           | 33,754 (28.0)        | 1,267 (41.3) |         | 3.46 (3.03, 3.94)                    | 3.13 (2.75, 3.57)     |
| Gender                                        |                      |              | <0.001  |                                      |                       |
| Men                                           | 22,603 (18.8)        | 210 (6.9)    |         | 1.00                                 | 1.00                  |
| Women                                         | 97,964 (81.3)        | 2,857 (93.2) |         | 3.17 (2.63, 3.81)                    | 2.74 (2.28, 3.29)     |
| Marriage                                      |                      |              | <0.001  |                                      |                       |
| Never married                                 | 19,173 (15.9)        | 231 (7.5)    |         | 1.00                                 | 1.00                  |
| Married                                       | 81,182 (67.4)        | 2,091 (68.3) |         | 1.96 (1.66, 2.31)                    | 0.93 (0.77, 1.12)     |
| Divorced/separated/widowed                    | 20,131 (16.7)        | 740 (24.2)   |         | 3.37 (2.80, 4.05)                    | 1.02 (0.80, 1.30)     |
| Income per month (10 <sup>4</sup> Korean won) |                      |              | <0.001  |                                      |                       |
| ≥4.0                                          | 24,930 (20.7)        | 411 (13.4)   |         | 1.00                                 | 1.00                  |
| <1.0                                          | 35,435 (29.4)        | 1,322 (43.1) |         | 2.38 (2.07, 2.73)                    | 1.71 (1.47, 1.99)     |
| 1.0-<2.5                                      | 32,902 (27.3)        | 863 (28.1)   |         | 1.76 (1.53, 2.03)                    | 1.59 (1.37, 1.83)     |
| 2.5-<4.0                                      | 27,300 (22.6)        | 471 (15.4)   |         | 1.02 (0.87, 1.20)                    | 1.01 (0.85, 1.19)     |
| Education                                     |                      |              | <0.001  |                                      |                       |
| Middle school or lower                        | 45,874 (38.1)        | 1,836 (59.9) |         | 1.00                                 | 1.00                  |
| High school                                   | 52,741 (43.7)        | 980 (32.0)   |         | 0.40 (0.36, 0.44)                    | 0.58 (0.50, 0.67)     |
| College or higher                             | 21,952 (18.2)        | 251 (8.2)    |         | 0.26 (0.22, 0.31)                    | 0.42 (0.34, 0.51)     |
| Occupation                                    |                      |              | <0.001  |                                      |                       |
| Unemployed or housekeeper                     | 52,337 (43.5)        | 1,803 (58.8) |         | 1.00                                 | 1.00                  |
| Experts                                       | 13,111 (10.9)        | 137 (4.5)    |         | 0.36 (0.29, 0.43)                    | 0.52 (0.42, 0.64)     |
| Clerical/services                             | 26,615 (22.1)        | 443 (14.5)   |         | 0.46 (0.40, 0.53)                    | 0.59 (0.51, 0.67)     |
| Simple skill                                  | 28,370 (23.6)        | 683 (22.3)   |         | 0.70 (0.62, 0.79)                    | 0.78 (0.69, 0.89)     |
| Drinking                                      |                      |              | 0.004   |                                      |                       |
| Regular alcohol drinkers                      | 5,557 (4.61)         | 107 (3.49)   |         | 0.69 (0.55, 0.87)                    | 1.10 (0.87, 1.39)     |

Values are presented as number (%).
