# Supplementary material for: Secondhand smoke exposure and mental health problems in Korean adults
Source: PubMed Central journal article supplement (PMC4846743; doi:10.4178/epih.e2016009), 2016-03-14
Supplement: epih-38-e2016009-app3.pdf [file epih-38-e2016009-app3.pdf]

**Appendix 3.** Factors associated with high stress

| Variables (n = 123,665)                       | High stress   |               | p-value | Odds ratio (95% confidence interval) |                       |
|-----------------------------------------------|---------------|---------------|---------|--------------------------------------|-----------------------|
|                                               | No            | Yes           |         | Unadjusted                           | Gender, age -adjusted |
| Age (yr)                                      |               |               | <0.001  |                                      |                       |
| 19-39                                         | 28,829 (30.7) | 10,204 (34.5) |         | 1.00                                 | 1.00                  |
| 40-59                                         | 37,644 (40.1) | 11,930 (40.3) |         | 0.91 (0.88, 0.94)                    | 0.89 (0.86, 0.92)     |
| ≥60                                           | 27,524 (29.3) | 7,438 (25.2)  |         | 0.79 (0.76, 0.83)                    | 0.76 (0.74, 0.81)     |
| Gender                                        |               |               | <0.001  |                                      |                       |
| Men                                           | 18,161 (19.3) | 4,643 (15.7)  |         | 1.00                                 | 1.00                  |
| Women                                         | 75,836 (80.7) | 24,929 (84.3) |         | 1.18 (1.13, 1.23)                    | 1.23 (1.17, 1.28)     |
| Marriage                                      |               |               | <0.001  |                                      |                       |
| Never married                                 | 14,433 (15.4) | 4,971 (16.8)  |         | 1.00                                 | 1.00                  |
| Married                                       | 63,361 (67.5) | 19,900 (67.4) |         | 0.91 (0.88, 0.95)                    | 1.03 (0.98, 1.08)     |
| Divorced/separated/widowed                    | 16,143 (17.2) | 4,676 (15.8)  |         | 0.91 (0.86, 0.96)                    | 1.10 (1.02, 1.19)     |
| Income per month (10 <sup>4</sup> Korean won) |               |               | <0.001  |                                      |                       |
| ≥4.0                                          | 19,410 (20.7) | 5,921 (20.0)  |         | 1.00                                 | 1.00                  |
| <1.0                                          | 27,736 (29.5) | 8,984 (30.4)  |         | 1.13 (1.08, 1.19)                    | 1.24 (1.17, 1.30)     |
| 1.0-<2.5                                      | 25,568 (27.2) | 8,181 (27.7)  |         | 1.12 (1.07, 1.17)                    | 1.14 (1.09, 1.20)     |
| 2.5-<4.0                                      | 21,283 (22.6) | 6,486 (21.9)  |         | 0.98 (0.94, 1.03)                    | 0.98 (0.93, 1.03)     |
| Education                                     |               |               | 0.050   |                                      |                       |
| Middle school or lower                        | 36,518 (38.9) | 11,134 (37.7) |         | 1.00                                 | 1.00                  |
| High school                                   | 40,783 (43.4) | 12,935 (43.7) |         | 0.99 (0.95, 1.03)                    | 0.80 (0.76, 0.84)     |
| College or higher                             | 16,696 (17.8) | 5,503 (18.6)  |         | 1.04 (0.99, 1.09)                    | 0.86 (0.81, 0.91)     |
| Occupation                                    |               |               | <0.001  |                                      |                       |
| Unemployed or housekeeper                     | 42,476 (45.2) | 11,608 (39.3) |         | 1.00                                 | 1.00                  |
| Experts                                       | 9,569 (10.2)  | 3,679 (12.5)  |         | 1.47 (1.40, 1.55)                    | 1.47 (1.40, 1.55)     |
| Clerical/services                             | 19,302 (20.6) | 7,754 (26.2)  |         | 1.47 (1.42, 1.54)                    | 1.46 (1.40, 1.52)     |
| Simple skill                                  | 22,543 (24.0) | 6,506 (22.0)  |         | 1.11 (1.06, 1.16)                    | 1.18 (1.13, 1.24)     |
| Drinking                                      |               |               | <0.001  |                                      |                       |
| Regular alcohol drinkers                      | 3,978 (4.23)  | 1,683 (5.69)  |         | 1.40 (1.31, 1.50)                    | 1.46 (1.36, 1.57)     |

Values are presented as number (%).

**Appendix 4.** Association between smoking status and mental health problems in total participants

| Smoking status     | Total   | Depressive symptoms |                   | Diagnosed depression |                   | High stress   |                   |
|--------------------|---------|---------------------|-------------------|----------------------|-------------------|---------------|-------------------|
| Total participants |         |                     |                   |                      |                   |               |                   |
| Non-smokers        | 123,617 | 5,523 (4.8)         | 1.00              | 3067 (2.2)           | 1.00              | 29,572 (25.0) | 1.00              |
| Former smokers     | 31,988  | 961 (3.4)           | 1.58 (1.41, 1.78) | 466 (1.4)            | 1.81 (1.52, 2.15) | 6,982 (24.7)  | 1.21 (1.15, 1.27) |
| Current smokers    | 44,491  | 1,807 (4.3)         | 1.92 (1.73, 2.14) | 582 (1.3)            | 1.89 (1.59, 2.26) | 14,099 (34.5) | 1.75 (1.67, 1.83) |
| Men                |         |                     |                   |                      |                   |               |                   |
| Non-smokers        | 22,812  | 493 (2.4)           | 1.00              | 210 (0.8)            | 1.00              | 4,643 (22.7)  | 1.00              |
| Former smokers     | 29,962  | 758 (2.9)           | 1.31 (1.12, 1.53) | 341 (1.1)            | 1.36 (1.06, 1.74) | 6,301 (24.0)  | 1.13 (1.07, 1.19) |
| Current smokers    | 41,447  | 1,373 (3.6)         | 1.58 (1.38, 1.81) | 347 (0.8)            | 1.16 (0.92, 1.47) | 12,775 (33.8) | 1.63 (1.55, 1.72) |
| Women              |         |                     |                   |                      |                   |               |                   |
| Non-smokers        | 100,805 | 5,030 (5.5)         | 1.00              | 2,857 (2.6)          | 1.00              | 24,929 (25.7) | 1.00              |
| Former smokers     | 2,026   | 203 (10.4)          | 1.70 (1.42, 2.04) | 125 (5.3)            | 1.88 (1.48, 2.39) | 681 (33.8)    | 1.42 (1.26, 1.60) |
| Current smokers    | 3,044   | 434 (15.7)          | 2.55 (2.22, 2.93) | 235 (8.2)            | 2.95 (2.47, 3.54) | 1,324 (45.5)  | 2.13 (1.93, 2.34) |

Values are presented as number (%) or odds ratio (95% confidence interval).

Adjusted for age, gender, body mass index, marital status, education level, occupation, income, regular exercise, alcohol drinking, hypertension, diabetes, dyslipidemia, sleep time.
